# Supplementary material
Source: PubMed Central journal article supplement (PMC7111476)
Supplement: mmc1.pdf [file mmc1.pdf]

**Structure, Volume 27**

**Supplemental Information**

**Automatically Fixing Errors  
in Glycoprotein Structures with Rosetta**

**Brandon Frenz, Sebastian Rämisch, Andrew J. Borst, Alexandra C. Walls, Jared Adolf-Bryfogle, William R. Schief, David Veessler, and Frank DiMaio**

**A**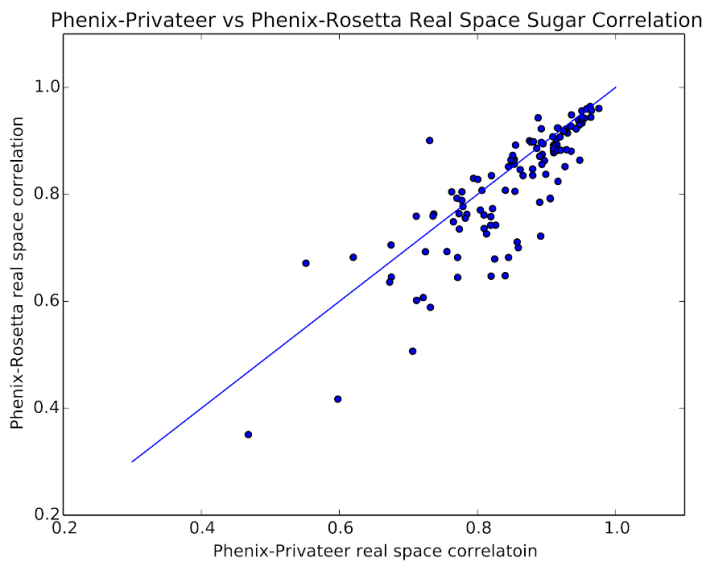**B**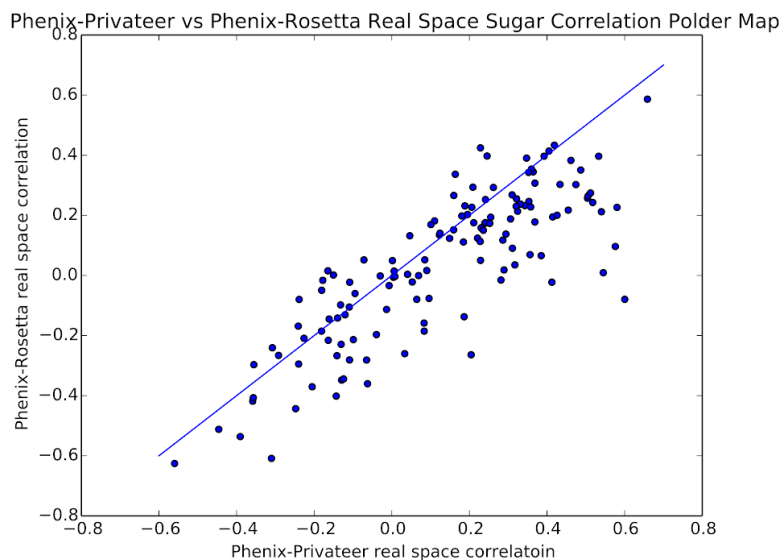

**Supplemental Figure 1. Related to Table 1. The real space correlation of the models when refined with Phenix and Privateer or Phenix Rosetta in the raw data and in the Polder Map.**

This figure shows the per-glycan real-space correlation for each of 133 glycans in the crystal structure benchmark set. Axis indicate the correlation following: refinement with Phenix using Privateer-produced constraints on high-energy ring conformations (x-axis); and Phenix-Rosetta (y-axis). **A.** shows the correlation to the 2mFo-dFc density map. **B.** shows the correlation to the polder map. Correlations tend to decrease in the Rosetta refined models, likely due to the increased constraints on the geometry preventing the structure from over fitting to the data.

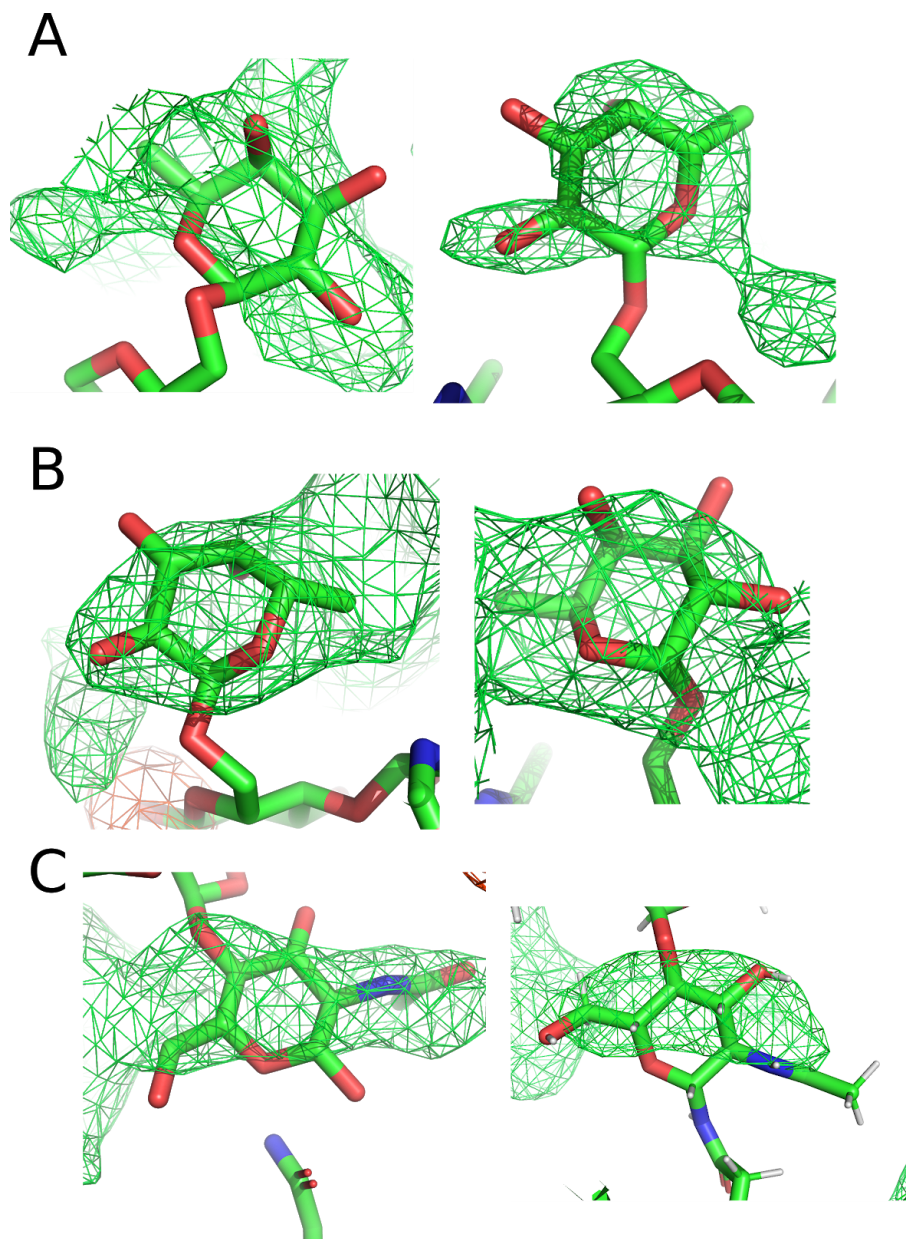

**Supplemental Figure 2. Related To Figure 1. Polder OMIT Map of Problem Glycans.**

**A.** Fucose 507 of 5nsc of the input model left and the refined model right. Poor geometry of the glycosidic bond is resolved while fit to density is maintained. **B.** Fucose 507 of 5k65 input (left) and refined (right). Both models agree with the data but in the refined model the high energy ring conformation is resolved while maintaining good fit. **C.** The glycosidic bond between asparagine 297 and NAG 501 is missing from the input model (right) and formed in the refined model (left).

## # Aldohexoses

| # | Code | Rosetta Code | Default HETNAM    | PATCHES |
|---|------|--------------|-------------------|---------|
|   | ALL  | All          | ->?)-beta-D-Allp  |         |
|   | DSR  | All          | ->?)-beta-D-Allp  |         |
|   | GLC  | Glc          | ->?)-alpha-D-Glcp | default |
|   | AGL  | Glc          | ->?)-alpha-D-Glcp |         |
|   | BG6  | Glc          | ->?)-beta-D-Glcp  |         |
|   | BGC  | Glc          | ->?)-beta-D-Glcp  |         |
|   | DDA  | Glc          | ->?)-beta-D-Glcp  |         |
|   | DRI  | Glc          | ->?)-beta-D-Glcp  |         |
|   | G16  | Glc          | ->?)-alpha-D-Glcp |         |
|   | G1P  | Glc          | ->?)-alpha-D-Glcp |         |
|   | G4D  | Glc          | ->?)-alpha-D-Glcp |         |
|   | G6P  | Glc          | ->?)-alpha-D-Glcp |         |
|   | G6Q  | Glc          | ->?)-D-Glc        |         |
|   | GCS  | Glc          | ->?)-beta-D-Glcp  |         |
|   | GDA  | Glc          | ->?)-alpha-D-Glcp |         |
|   | GFP  | Glc          | ->?)-alpha-D-Glcp |         |
|   | GLF  | Glc          | ->?)-alpha-D-Glcp |         |
|   | GLO  | Glc          | ->?)-alpha-D-Glc  |         |
|   | GLT  | Glc          | ->?)-alpha-D-Glcp |         |
|   | GTM  | Glc          | ->?)-beta-D-Glcp  |         |
|   | KBG  | Glc          | ->?)-beta-D-Glcp  |         |
|   | MA3  | Glc          | ->?)-alpha-D-Glcp |         |
|   | MGL  | Glc          | ->?)-beta-D-Glcp  |         |
|   | NDG  | Glc          | ->?)-alpha-D-Glcp | 2-AcNH  |
|   | TOA  | Glc          | ->?)-alpha-D-Glcp |         |
|   | TOC  | Glc          | ->?)-alpha-D-Glcp |         |
|   | NAG  | Glc          | ->?)-beta-D-Glcp  | 2-AcNH  |
|   | MUR  | Mur          | ->?)-beta-D-Murp  |         |
|   | G6D  | Qui          | ->?)-alpha-D-Quip |         |

### Supplemental Figure 3. Related To STAR Methods Writing Glycans In Standard Format. An example of additional patch names added to the glycan naming database

A new column for a list of patch names has been added to the database that maps PDB codes to Rosetta names. Patch names are added to eliminate redundancy when returning from Rosetta name to PDB code. The "default" keyword signals that this is the base, unmodified, code name.
